# Supplementary material for: Role of the transcriptional regulator SP140 in resistance to bacterial infections via repression of type I interferons
Source: eLife journal article supplement (doi:10.7554/elife.67290), 2021-06-21
Supplement: supp [file elife-67290-supp-v1.zip]

Archive with 10 entries (10 files):
- elife_poa_e67290_Transparent_Reporting_File.pdf
- elife_poa_e67290_Figure_1_figure_supplement_1.pdf
- elife_poa_e67290_Figure_2_figure_supplement_1.pdf
- elife_poa_e67290_Figure_2_figure_supplement_2.pdf
- elife_poa_e67290_Figure_2_figure_supplement_3.pdf
- elife_poa_e67290_Figure_2_figure_supplement_4.pdf
- elife_poa_e67290_Figure_3_figure_supplement_1.pdf
- elife_poa_e67290_Figure_4_figure_supplement_1.pdf
- elife_poa_e67290_Figure_4_figure_supplement_2.pdf
- elife_poa_e67290_Figure_5_figure_supplement_1.pdf
