# Supplementary material for: Role of the transcriptional regulator SP140 in resistance to bacterial infections via repression of type I interferons
Source: eLife journal article supplement (doi:10.7554/elife.67290), 2021-06-21
Supplement: supp [file elife-67290-supp-v1.zip › elife_poa_e67290_Figure_1_figure_supplement_1.pdf]

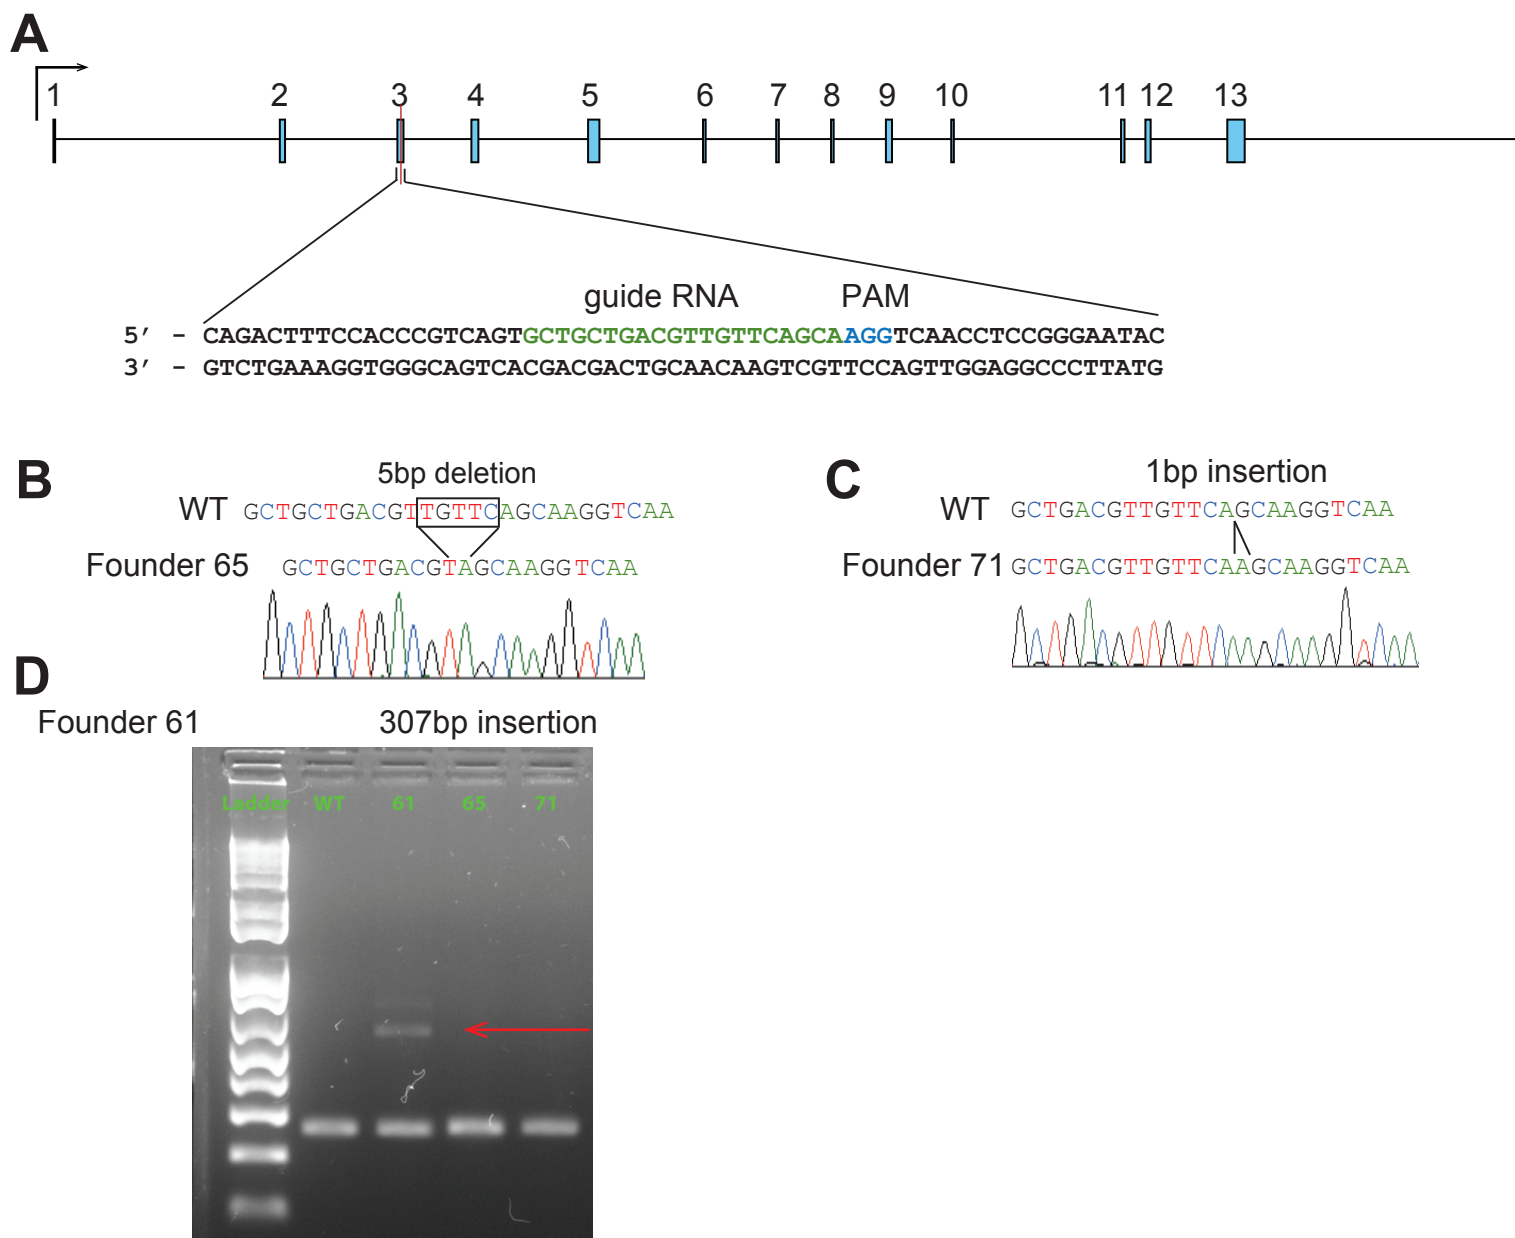

**Figure 1 – figure supplement 1. CRISPR–Cas9 targeting strategy for *Sp110*<sup>−/−</sup> mice. (A)** Mouse *Sp110* gene. Guide RNA sequence for CRISPR–Cas9 targeting and protospacer-adjacent motif (PAM) are indicated. **(B–D)** *Sp110* locus in wildtype (WT) and three independent lines. Homozygotes of 2 lines identified by sequencing **(B–C)**, and heterozygote of the 3rd line by PCR products separated on an agarose gel **(D)**. Arrow indicates the mutant band.
