# Supplementary material for: Role of the transcriptional regulator SP140 in resistance to bacterial infections via repression of type I interferons
Source: eLife journal article supplement (doi:10.7554/elife.67290), 2021-06-21
Supplement: supp [file elife-67290-supp-v1.zip › elife_poa_e67290_Figure_2_figure_supplement_1.pdf]

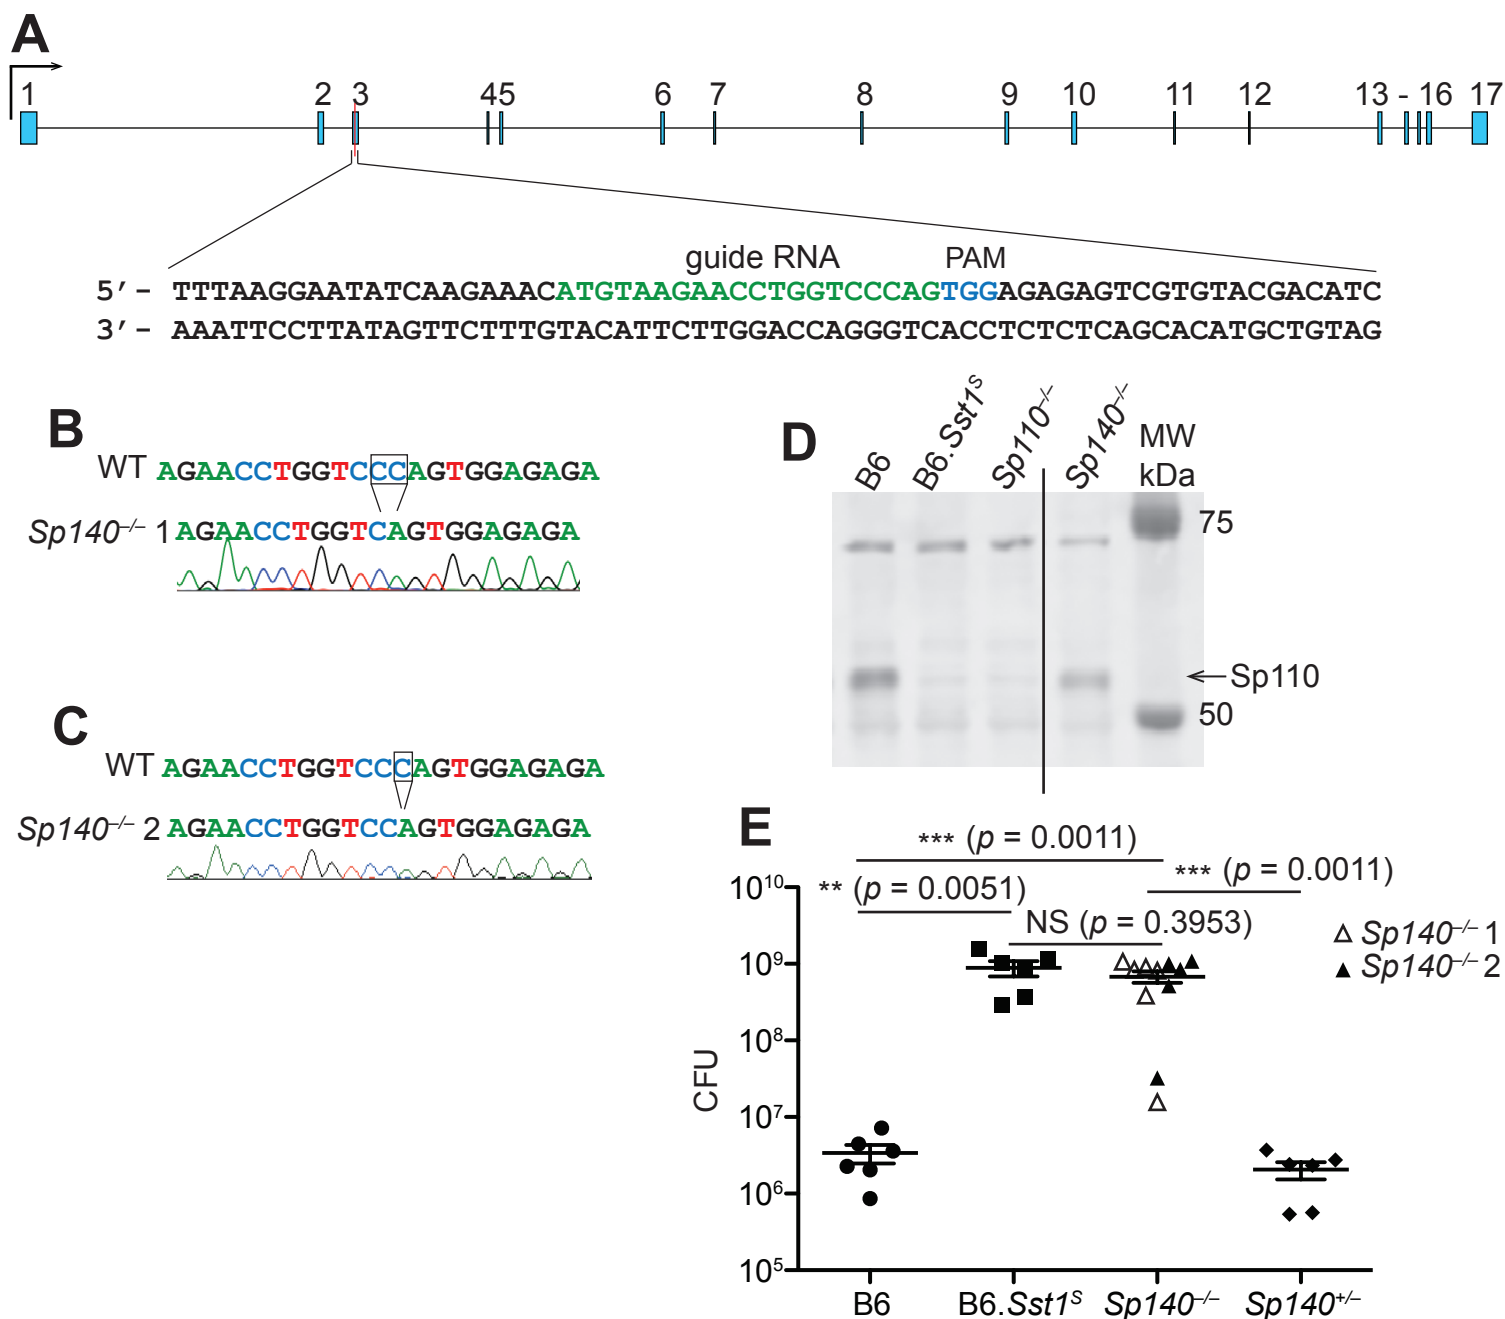

**Figure 2 – figure supplement 1. CRISPR–Cas9 targeting strategy for *Sp140*<sup>-/-</sup> and validation of founders.** (A) Mouse *Sp140* gene. Guide RNA sequence for CRISPR–Cas9 targeting and protospacer-adjacent motif (PAM) are indicated. (B–C) *Sp140* locus in wildtype (WT) and 2 independent founders of *Sp140*<sup>-/-</sup> validated by sequencing. (D) Immunoblot for SP110 using BMMs from mice of the indicated genotypes. Intervening lanes have been removed for clarity (indicated by line in the image). (E) *M. tuberculosis*-infected mice were harvested for CFU at 25 days post-infection. Empty and filled triangles indicate the two independent lines of *Sp140*<sup>-/-</sup> used in this infection. All mice were bred in-house and *Sp140*<sup>+/-</sup> were littermates with *Sp140*<sup>-/-</sup> line 2. Mann-Whitney test, \*,  $p \leq 0.05$ ; \*\*,  $p \leq 0.01$ ; \*\*\*,  $p \leq 0.005$ .
