# Supplementary material for: Role of the transcriptional regulator SP140 in resistance to bacterial infections via repression of type I interferons
Source: eLife journal article supplement (doi:10.7554/elife.67290), 2021-06-21
Supplement: supp [file elife-67290-supp-v1.zip › elife_poa_e67290_Figure_2_figure_supplement_2.pdf]

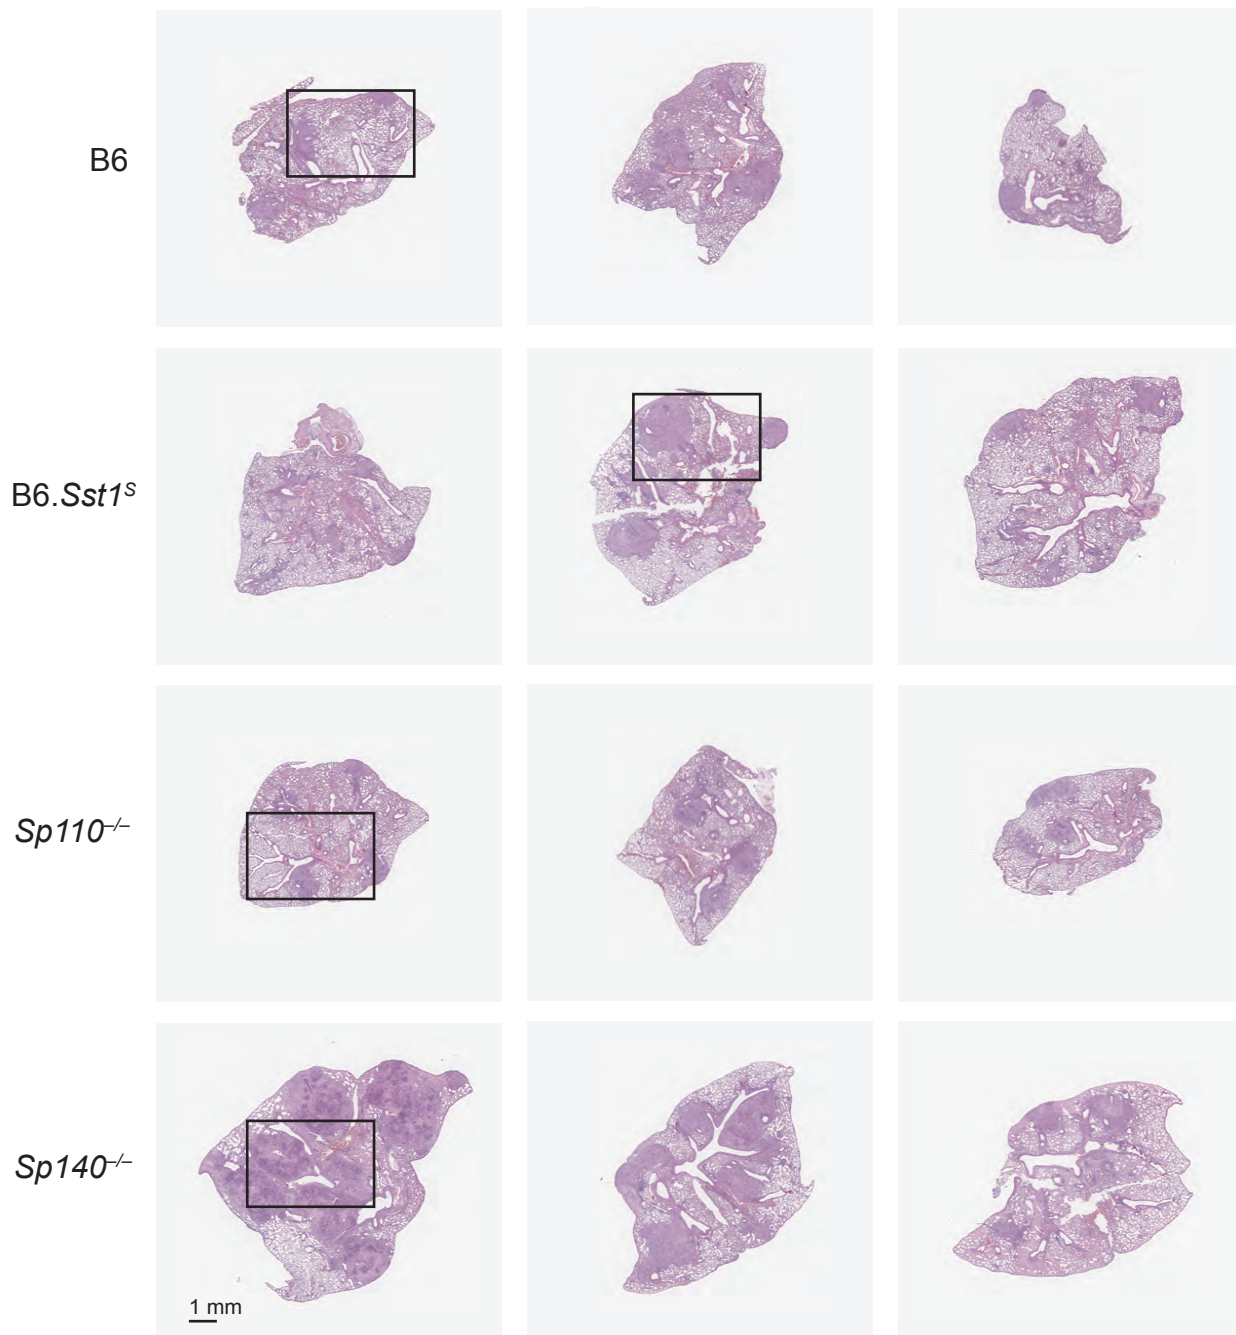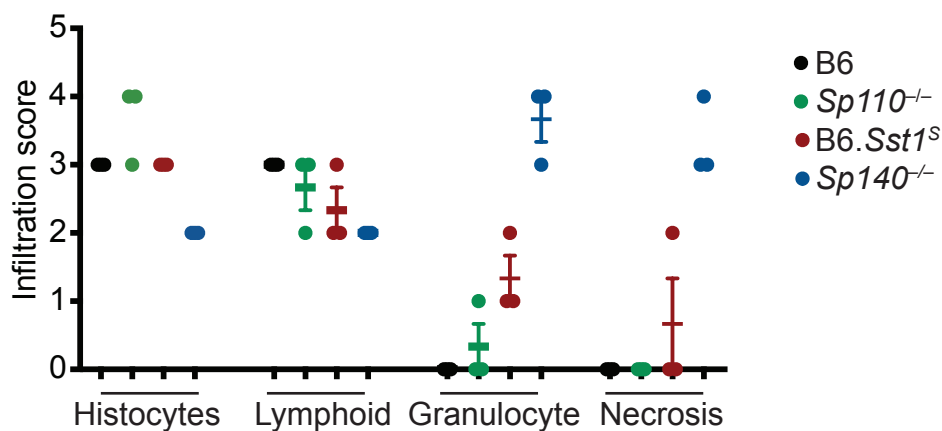

**Figure 2 – figure supplement 2. Histology of lungs from B6, B6.Sst1<sup>S</sup>, Sp110<sup>-/-</sup>, Sp140<sup>-/-</sup> mice after infection with *M. tuberculosis*.** H&E staining of entire lung sections from mice of indicated genotypes at 25 days post-infection with *M. tuberculosis*. Black squares denote sections shown in Figure 2C. Each image represents a lung section from a different mouse. Borders in background color have been added around each image. Scale bar applies to all images. Samples were evaluated and scored (0-4, least to most) for macrophage (histocyte), lymphoid, granulocyte infiltration, and extent of necrosis.
