# Supplementary material for: Role of the transcriptional regulator SP140 in resistance to bacterial infections via repression of type I interferons
Source: eLife journal article supplement (doi:10.7554/elife.67290), 2021-06-21
Supplement: supp [file elife-67290-supp-v1.zip › elife_poa_e67290_Figure_2_figure_supplement_3.pdf]

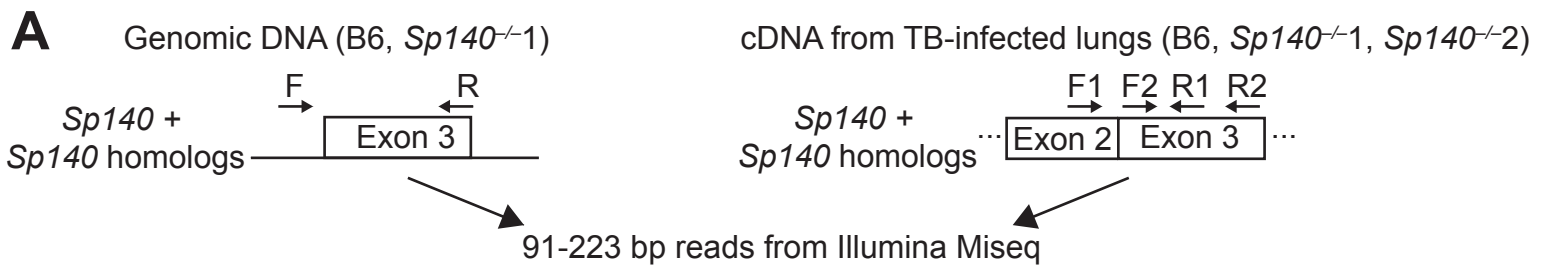

**B**

Summary of edited *Sp140* homologs in *Sp140*<sup>-/-</sup> mice

| Name                   | Dataset                                                                   | Distinguishing SNPs from <i>Sp140</i> mRNA | Edited in <i>Sp140</i> <sup>-/-1</sup> ? | Edited in <i>Sp140</i> <sup>-/-2</sup> ? | Estimated level of expression in TB-infected lungs |
|------------------------|---------------------------------------------------------------------------|--------------------------------------------|------------------------------------------|------------------------------------------|----------------------------------------------------|
| LOC100041057           | <i>Sp140</i> exon 3 amplicons, DNA ( <i>Sp140</i> <sup>-/-1</sup> and B6) | G at 1483, T at 1513                       | Yes                                      | Unknown (not expressed)                  | None                                               |
| <i>Sp140</i> homolog 1 | <i>Sp140</i> exon 3 amplicons, DNA ( <i>Sp140</i> <sup>-/-1</sup> and B6) | T at 1482, G at 1483                       | Yes                                      | Unknown (not expressed)                  | None                                               |
| <i>Sp140</i> homolog 2 | <i>Sp140</i> exon 2, 3 amplicons, cDNA; RNA-seq of TB-infected lungs      | None                                       | Yes                                      | No                                       | Expressed                                          |
| <i>Sp140</i> homolog 3 | <i>Sp140</i> exon 3 amplicons, cDNA                                       | T at 1462                                  | Yes                                      | Yes                                      | Very low (not detectable by RNA-seq)               |
| <i>Sp140</i> homolog 4 | <i>Sp140</i> exon 3 amplicons, cDNA                                       | T at 1500                                  | Yes                                      | Yes                                      | Very low (not detectable by RNA-seq)               |

**Figure 2 – figure supplement 3. Characterization of off-target genes mutated in *Sp140*<sup>-/-</sup> mice. (A)** Schematic of amplicon sequencing strategy for *Sp140* and *Sp140* homologs. **(B)** Summary of edited *Sp140* homologs from amplicon sequencing and RNA-seq analysis. SNPs are denoted based on the *Sp140* X1 transcript. Expression level was roughly estimated from read counts. Three B6 and 2 *Sp140*<sup>-/-</sup> mice from each founder line were used as biological replicates for *Sp140* exon 2/3 amplicon sequencing from cDNA, 2 mice per genotype were used for *Sp140* exon 3 amplicon sequencing from cDNA, and 1 mouse per genotype was used for *Sp140* exon 3 amplicon sequencing from DNA.
