# Supplementary material for: Role of the transcriptional regulator SP140 in resistance to bacterial infections via repression of type I interferons
Source: eLife journal article supplement (doi:10.7554/elife.67290), 2021-06-21
Supplement: supp [file elife-67290-supp-v1.zip › elife_poa_e67290_Figure_2_figure_supplement_4.pdf]

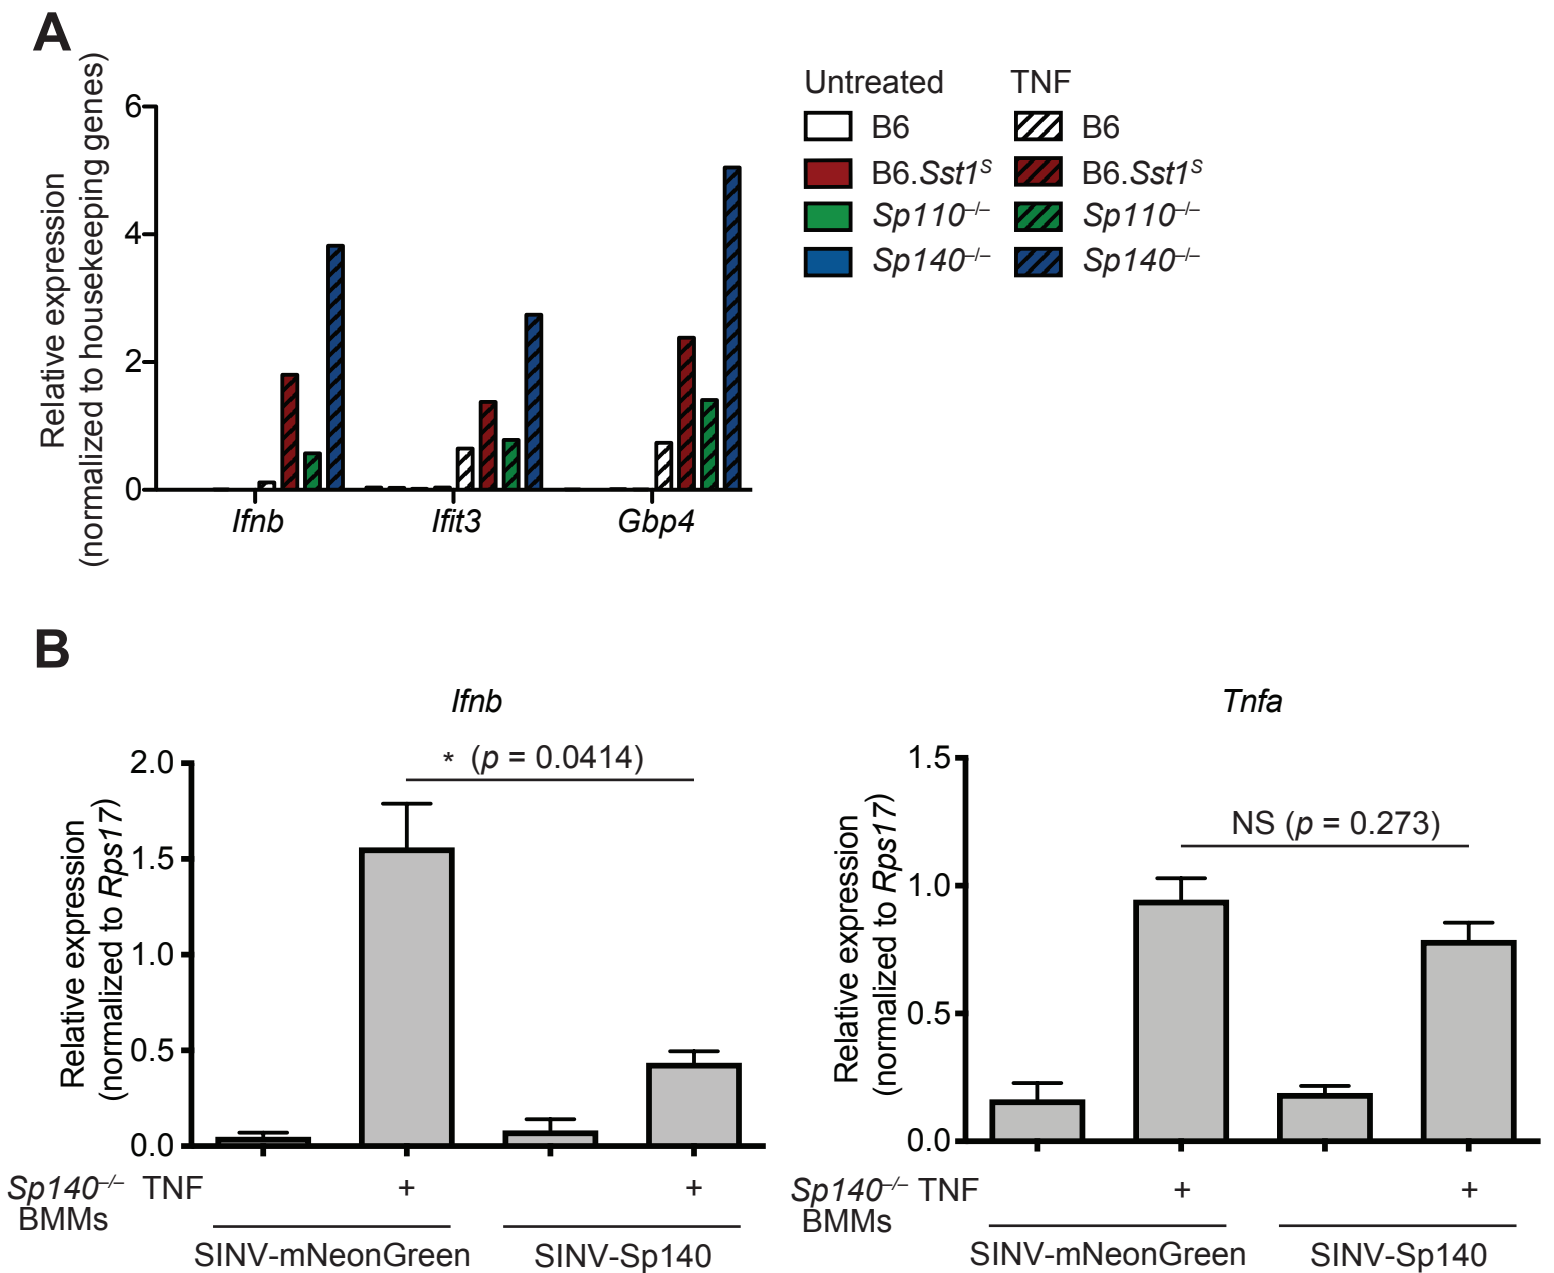

**Figure 2 – figure supplement 4. Complementation of hyper type I IFN responses in *Sp140*<sup>-/-</sup> BMMs.** (A) BMMs were left untreated or treated with TNF- $\alpha$  for 24 hours. Total RNA was used for RT-qPCR. Averages of technical duplicates for one biological replicate are shown. Data is representative of two independent experiments. (B) RT-qPCR of *Sp140*<sup>-/-</sup> BMMs transduced with either control SINV-minC-MV-GAL4-mNeonGreen (SINV-mNeonGreen) or SINV-minCMV-Sp140 (SINV-Sp140), primed with 5 ng/mL IFN- $\gamma$  for 14 hours and treated with 10 ng/mL TNF- $\alpha$  for 4 hours. \*,  $p \leq 0.05$  calculated with an unpaired t-test with Welch's correction. Data are representative of two independent experiments.
