# Supplementary material for: Role of the transcriptional regulator SP140 in resistance to bacterial infections via repression of type I interferons
Source: eLife journal article supplement (doi:10.7554/elife.67290), 2021-06-21
Supplement: supp [file elife-67290-supp-v1.zip › elife_poa_e67290_Figure_3_figure_supplement_1.pdf]

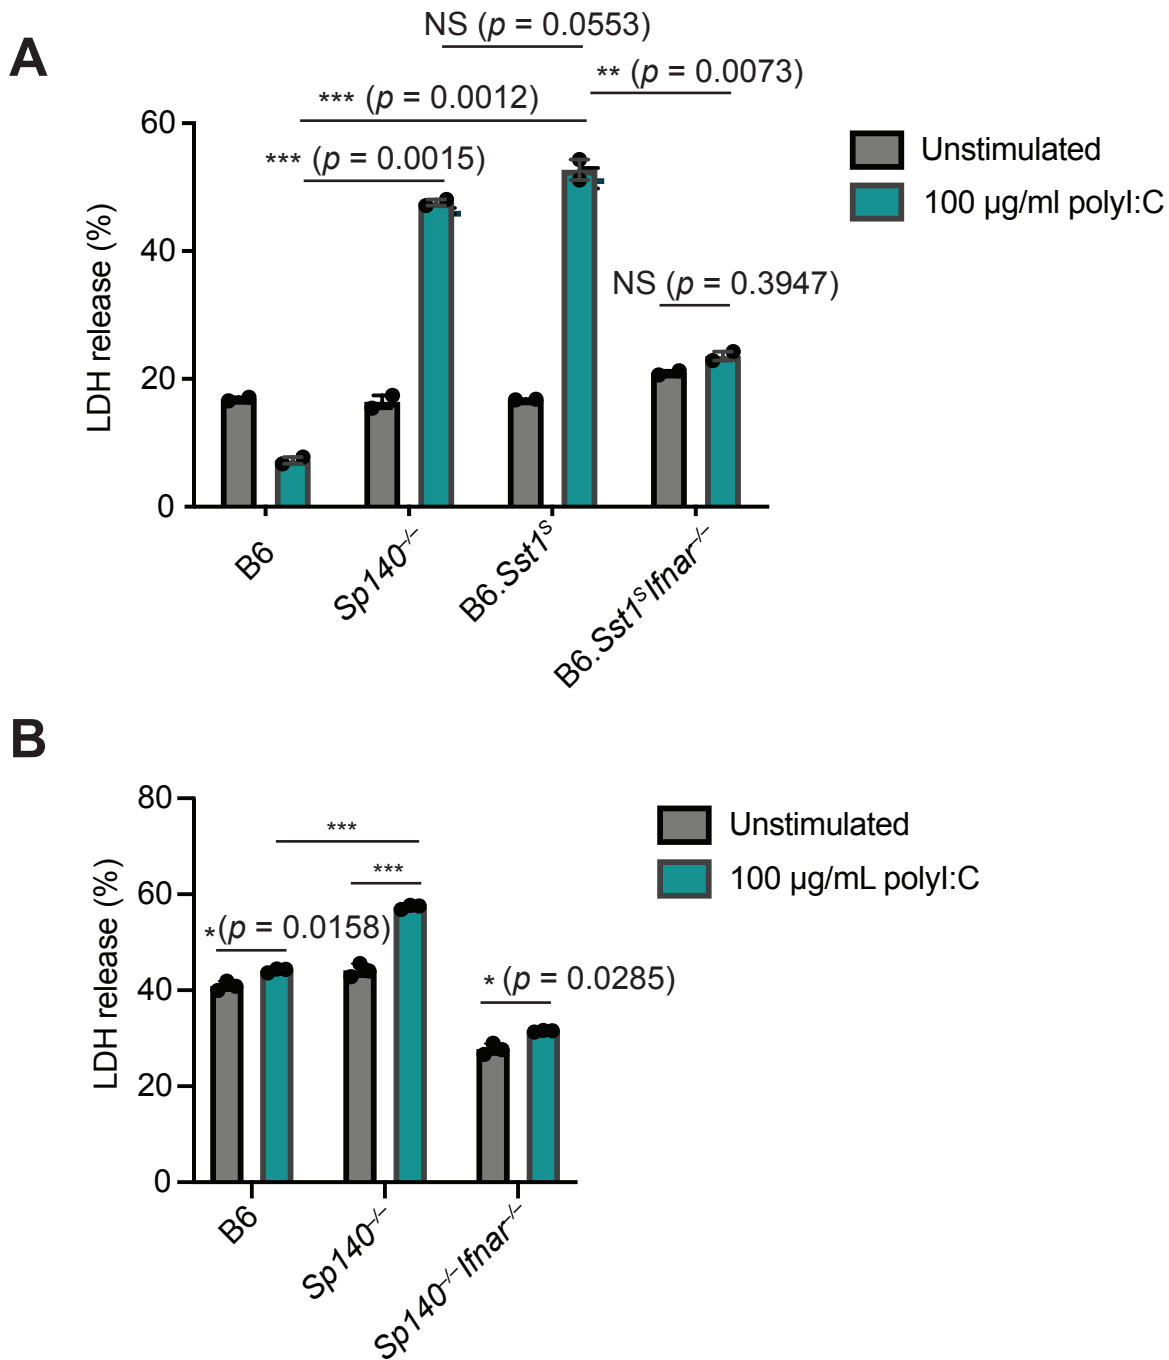

**Figure 3 – figure supplement 1. BMMs from  $B6.Sst1^S$  and  $Sp140^{-/-}$  mice show increased cell death upon stimulation with polyI:C, which is dependent upon IFNAR signaling.** LDH release from primary BMMs after 16-24 hour stimulation with 100 µg/mL polyI:C for (A) B6,  $B6.Sst1^S$ ,  $Sp140^{-/-}$ ,  $B6.Sst1^SIfnar^{-/-}$  mice. Results are technical duplicates and representative of three independent experiments for B6 (3 mice),  $B6.Sst1^S$  (2 mice), and  $Sp140^{-/-}$  (2 mice) samples, and two independent experiments for  $B6.Sst1^SIfnar^{-/-}$  sample (1 mouse). (B) LDH release after polyI:C stimulation for primary BMMs from B6,  $Sp140^{-/-}$ , and  $Sp140^{-/-}Ifnar^{-/-}$  mice. Results represent technical triplicates and are representative of two independent experiments for two mice per genotype. \*,  $p \leq 0.05$ ; \*\*,  $p \leq 0.01$ ; \*\*\*,  $p \leq 0.005$  as calculated with an unpaired t-test with Welch's correction.
