# Supplementary material for: Role of the transcriptional regulator SP140 in resistance to bacterial infections via repression of type I interferons
Source: eLife journal article supplement (doi:10.7554/elife.67290), 2021-06-21
Supplement: supp [file elife-67290-supp-v1.zip › elife_poa_e67290_Figure_4_figure_supplement_1.pdf]

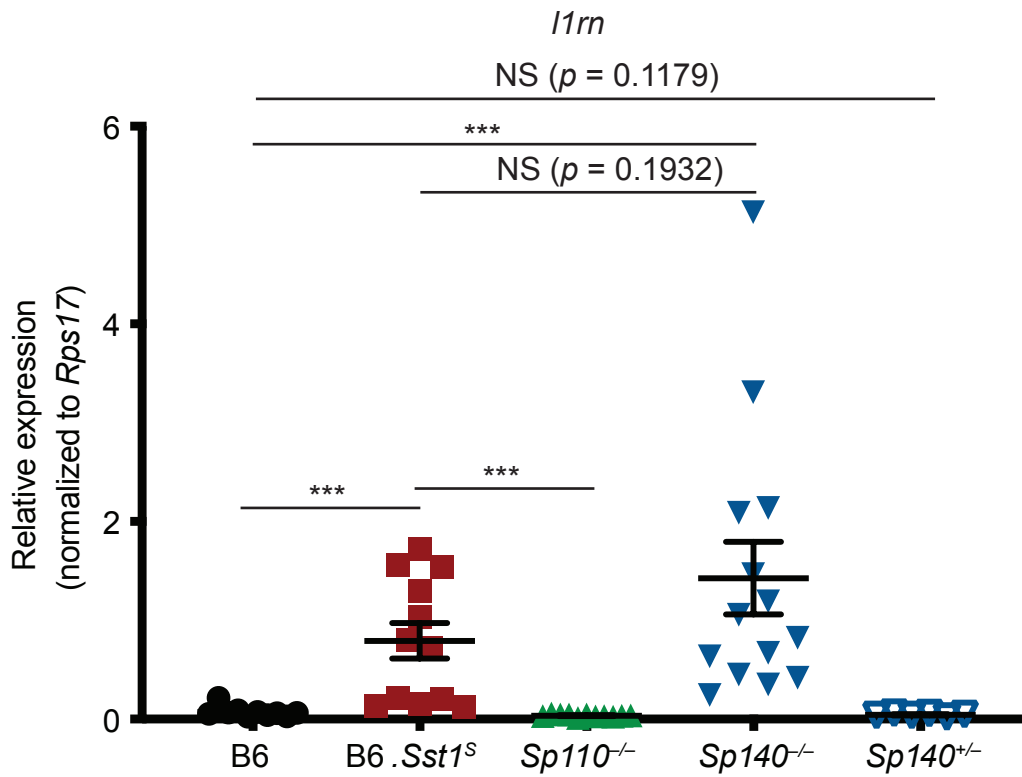

**Figure 4 – figure supplement 1. B6.Sst1<sup>S</sup> and Sp140<sup>-/-</sup> lungs exhibit elevated transcript levels of the interferon stimulated gene *Il1rn* during *M. tuberculosis* infection.** RT-qPCR for *Il1rn* (encodes Il1ra) for RNA extracted from lungs at 28 days post-infection with *M. tuberculosis*. Combined results of two independent experiments. Mann-Whitney test, \*,  $p \leq 0.05$ ; \*\*,  $p \leq 0.01$ ; \*\*\*,  $p \leq 0.005$ .
