# Supplementary material for: Role of the transcriptional regulator SP140 in resistance to bacterial infections via repression of type I interferons
Source: eLife journal article supplement (doi:10.7554/elife.67290), 2021-06-21
Supplement: supp [file elife-67290-supp-v1.zip › elife_poa_e67290_Figure_4_figure_supplement_2.pdf]

|              | <i>Sp110</i> <sup>-/-</sup> vs. B6 |                          | <i>Sp140</i> <sup>-/-</sup> vs. B6 |                          | <i>Sp110</i> <sup>-/-</sup> vs. B6. <i>Sst1</i> <sup>S</sup> |                          | <i>Sp140</i> <sup>-/-</sup> vs. B6. <i>Sst1</i> <sup>S</sup> |                          |
|--------------|------------------------------------|--------------------------|------------------------------------|--------------------------|--------------------------------------------------------------|--------------------------|--------------------------------------------------------------|--------------------------|
| Gene         | Log2-fold change                   | Adjusted <i>p</i> -value | Log2-fold change                   | Adjusted <i>p</i> -value | Log2-fold change                                             | Adjusted <i>p</i> -value | Log2-fold change                                             | Adjusted <i>p</i> -value |
| <i>Sp100</i> | -0.1578                            | 0.2936                   | 0.3825                             | 0.0088                   | -0.3877                                                      | 0.0578                   | 0.1123                                                       | 0.5792                   |
| <i>Sp110</i> | -0.7750                            | 1.4E-12                  | 0.3382                             | 0.0025                   | 3.2647                                                       | 1.00E-52                 | 4.4200                                                       | 4.26E-97                 |
| <i>Sp140</i> | -0.4293                            | 0.0343                   | -0.4480                            | 0.0303                   | 1.7591                                                       | 1.49E-14                 | 1.7976                                                       | 3.64E-14                 |

**Figure 4 – figure supplement 2. Expression of SP family members in *Sp140*<sup>-/-</sup> and *Sp110*<sup>-/-</sup> mouse lungs during *M. tuberculosis* infection.** Log<sub>2</sub>-fold change and adjusted *p*-value for SP family members (*Sp100*, *Sp110*, *Sp140*) from RNA-seq of *M. tuberculosis*-infected lungs from *Sp110*<sup>-/-</sup> and *Sp140*<sup>-/-</sup> mice, compared to B6 and B6.*Sst1*<sup>S</sup>.
