# Supplementary material for: Role of the transcriptional regulator SP140 in resistance to bacterial infections via repression of type I interferons
Source: eLife journal article supplement (doi:10.7554/elife.67290), 2021-06-21
Supplement: supp [file elife-67290-supp-v1.zip › elife_poa_e67290_Figure_5_figure_supplement_1.pdf]

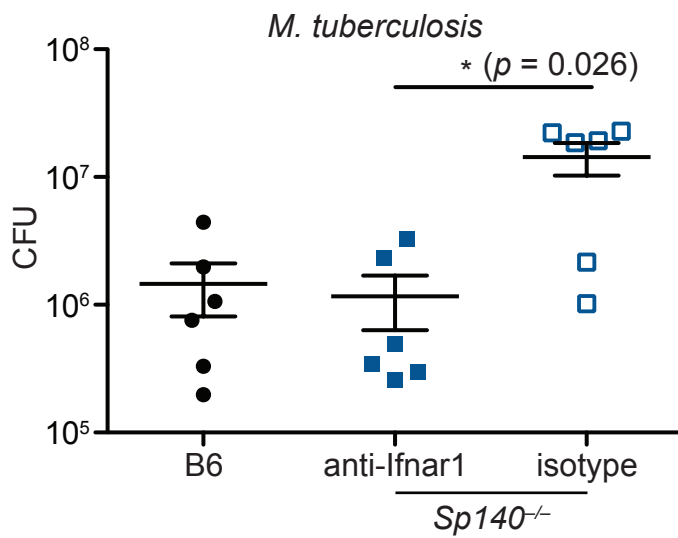

**Figure 5 – figure supplement 1. Antibody blockade of IFNAR1 reduces bacterial burden in *Sp140*<sup>-/-</sup> mice during *M. tuberculosis* infection.** Mice were infected with *M. tuberculosis* and treated with either IFNAR1-blocking antibody or isotype control starting 7 days post-infection. At 25 days post-infection lungs were harvested to enumerate CFU. Results of one experiment. All mice were bred in-house. Mann-Whitney test, \*,  $p \leq 0.05$ ; \*\*,  $p \leq 0.01$ ; \*\*\*,  $p \leq 0.005$ .
